# Supplementary material for: Arrhythmia Detection in Atrioventricular, Single-Lead, Floating Atrial Dipole ICD Systems Compared with Conventional Single- and Dual-Chamber Defibrillators
Source: MDPI journal article supplement (doi:10.3390/jcdd11120386), 2024-12-01
Supplement: s1 [file jcdd-3195363-supplementary.pdf › jcdd-3195363-supplementary.pdf]

# Arrhythmia detection in atrioventricular, single-lead, floating atrial dipole ICD systems compared to conventional single- and dual-chamber defibrillators

## Supplementary material

**Table S1.** Subgroup comparisons of baseline characteristics

|                                   | VVI<br>(N=93) | VDD<br>(N=94) | p-value |
|-----------------------------------|---------------|---------------|---------|
| Dyslipidaemia (n, %)              | 79 (85%)      | 85 (90%)      | 0.254   |
| LVEF (mean±SD) <sup>1</sup>       | 38.5±13.5     | 37.5±13.9     | 0.642   |
| QRS width (mean±SD) <sup>2</sup>  | 116.9±21.2    | 119±21.6      | 0.909   |
| Heart rate (mean±SD) <sup>3</sup> | 70.7±15.4     | 73.1±14.8     | 0.249   |
| Bradypacing indication (n, %)     | 1 (1%)        | 3 (3%)        | 0.317   |
| Hemoglobin (mean±SD) <sup>4</sup> | 130.7±20.6    | 136±16.8      | 0.062   |
| Remote monitoring (n, %)          | 6 (7%)        | 48 (51%)      | <0.001  |
|                                   | VVI<br>(N=93) | DDD<br>(N=69) | p-value |
| Dyslipidaemia (n, %)              | 79 (85%)      | 48 (71%)      | 0.027   |
| LVEF (mean±SD) <sup>1</sup>       | 38.5±13.5     | 47.5±16.3     | <0.001  |
| QRS width (mean±SD) <sup>2</sup>  | 116.9±21.2    | 136.9±29.2    | <0.001  |
| Heart rate (mean±SD) <sup>3</sup> | 70.7±15.4     | 66.9±18.6     | 0.117   |
| Bradypacing indication (n, %)     | 1 (1%)        | 36 (55%)      | <0.001  |
| Hemoglobin (mean±SD) <sup>4</sup> | 130.7±20.6    | 126.2±20.7    | 0.237   |
| Remote monitoring (n, %)          | 6 (7%)        | 13 (19%)      | 0.014   |
|                                   | VDD<br>(N=94) | DDD<br>(N=69) | p-value |
| Dyslipidaemia (n, %)              | 85 (90%)      | 48 (71%)      | 0.001   |
| LVEF (mean±SD) <sup>1</sup>       | 37.5±13.9     | 47.5±16.3     | 0.001   |
| QRS width (mean±SD) <sup>2</sup>  | 119±21.6      | 136.9±29.2    | 0.001   |
| Heart rate (mean±SD) <sup>3</sup> | 73.1±14.8     | 66.9±18.6     | 0.011   |
| Bradypacing indication (n, %)     | 3 (3%)        | 36 (55%)      | <0.001  |
| Hemoglobin (mean±SD) <sup>4</sup> | 136±16.8      | 126.2±20.7    | 0.008   |
| Remote monitoring (n, %)          | 48 (51%)      | 13 (19%)      | <0.001  |

<sup>1</sup> Non-normal distribution, independent samples Mann-Whitney U test.

<sup>2</sup> Non-normal distribution, independent samples Mann-Whitney U test.

<sup>3</sup> Non-normal distribution, independent samples Mann-Whitney U test.

<sup>4</sup> VVI vs. VDD: Non-normal distribution, independent samples Mann-Whitney U test, VVI vs. DDD: Normal distribution, independent samples t-test, VDD vs. DDD: Non-normal distribution, independent samples Mann-Whitney U test.

VVI: conventional single-chamber ICD; VDD: single-lead ICD device with a floating atrial dipole; DDD: conventional dual-chamber ICD; SD: standard deviation; LVEF: left ventricular ejection fraction

**Table S2.** Subgroup comparisons of baseline medical therapy

|                                               | <b>VVI<br/>(N=93)</b> | <b>VDD<br/>(N=94)</b> | <b>p-value</b>   |
|-----------------------------------------------|-----------------------|-----------------------|------------------|
| Beta-blockers (n, %)                          | 90 (97%)              | 90 (96%)              | 0.711            |
| Mineralocorticoid receptor antagonists (n, %) | 48 (52%)              | 52 (55%)              | 0.611            |
| Digitalis glycosides (n, %)                   | 13 (14%)              | 3 (3%)                | <b>0.008</b>     |
|                                               | <b>VVI<br/>(N=93)</b> | <b>DDD<br/>(N=69)</b> | <b>p-value</b>   |
| Beta-blockers (n, %)                          | 90 (97%)              | 53 (83%)              | <b>0.003</b>     |
| Mineralocorticoid receptor antagonists (n, %) | 48 (52%)              | 17 (27%)              | <b>0.002</b>     |
| Digitalis glycosides (n, %)                   | 13 (14%)              | 3 (5%)                | 0.059            |
|                                               | <b>VDD<br/>(N=94)</b> | <b>DDD<br/>(N=69)</b> | <b>p-value</b>   |
| Beta-blockers (n, %)                          | 90 (96%)              | 53 (83%)              | <b>0.006</b>     |
| Mineralocorticoid receptor antagonists (n, %) | 52 (55%)              | 17 (27%)              | <b>&lt;0.001</b> |
| Digitalis glycosides (n, %)                   | 3 (3%)                | 3 (5%)                | 0.629            |

**Table S3.** Multivariate analysis of time to first device detected atrial arrhythmia - VVI vs. VDD

| <b>Risk factor</b>                       | <b>unadjusted HR<br/>(95% CI)</b> | <b>p-value</b> | <b>adjusted HR<br/>(95% CI)</b> | <b>p-value</b>   |
|------------------------------------------|-----------------------------------|----------------|---------------------------------|------------------|
| ICD type                                 | 6.506 (2.176-19.446)              | <b>0.001</b>   | 7.087 (2.371-21.183)            | <b>&lt;0.001</b> |
| Age                                      | 1.004 (0.969-1.040)               | 0.837          |                                 |                  |
| Male                                     | 0.540 (0.226-1.291)               | 0.166          |                                 |                  |
| Primary prophylaxis                      | 6.989 (0.940-51.970)              | <b>0.058</b>   | 9.746 (1.301-73.014)            | <b>0.027</b>     |
| Ischemic etiology                        | 1.561 (0.609-4.002)               | 0.354          |                                 |                  |
| Previously diagnosed atrial fibrillation | 1.916 (0.743-4.942)               | 0.179          |                                 |                  |
| Hypertension                             | 2.280 (0.303-17.126)              | 0.423          |                                 |                  |
| Dyslipidaemia                            | 4.127 (0.554-30.776)              | 0.167          |                                 |                  |
| Diabetes mellitus                        | 1.456 (0.609-3.478)               | 0.398          |                                 |                  |
| Stroke/TIA                               | 0.043 (0.000-28.860)              | 0.343          |                                 |                  |
| Bradypacing indication                   | 7.895 (0.994-62.697)              | <b>0.051</b>   | 18.471 (1.973-172.887)          | <b>0.011</b>     |
| LVEF                                     | 0.981 (0.947-1.015)               | 0.270          |                                 |                  |
| QRS width                                | 1.009 (0.986-1.033)               | 0.442          |                                 |                  |
| Heart rate                               | 1.033 (1.001-1.066)               | <b>0.042</b>   | 1.038 (1.004-1.074)             | <b>0.028</b>     |
| Creatinine                               | 1.003 (0.996-1.009)               | 0.473          |                                 |                  |
| Hemoglobin                               | 1.003 (0.978-1.029)               | 0.809          |                                 |                  |
| Remote monitoring                        | 2.628 (1.133-6.093)               | <b>0.024</b>   | 0.907 (0.347-2.368)             | 0.841            |
| Antiplatelet therapy                     | 1.013 (0.412-2.489)               | 0.977          |                                 |                  |
| Anticoagulation                          | 1.609 (0.686-3.770)               | 0.274          |                                 |                  |
| Beta-blockers                            | 0.682 (0.092-5.075)               | 0.709          |                                 |                  |
| ACEI/ARB/ARNI                            | 0.550 (0.186-1.627)               | 0.280          |                                 |                  |
| Diuretics                                | 1.564 (0.668-3.661)               | 0.303          |                                 |                  |
| Calcium channel blockers                 | 0.884 (0.299-2.616)               | 0.824          |                                 |                  |

|                                        |                       |       |
|----------------------------------------|-----------------------|-------|
| Mineralocorticoid receptor antagonists | 1.020 (0.441-2.358)   | 0.963 |
| Statins                                | 1.057 (0.412-2.709)   | 0.909 |
| Amiodarone                             | 1.285 (0.474-3.483)   | 0.623 |
| Digitalis glycosides                   | 0.045 (0.000-116.944) | 0.440 |

HR: hazard ratio; CI: confidence interval; ICD: implantable cardioverter defibrillator; TIA: transient ischemic attack; ACEI: angiotensin-converting-enzyme inhibitor; ARB: angiotensin II receptor blocker; ARNI: angiotensin receptor-neprilysin inhibitor

**Table S4.** Multivariate analysis of time to first device detected atrial arrhythmia - VDD vs. DDD

| Risk factor                              | unadjusted HR<br>(95% CI) | p-value          | adjusted HR<br>(95% CI) | p-value      |
|------------------------------------------|---------------------------|------------------|-------------------------|--------------|
| ICD type                                 | 2.011 (1.110-3.642)       | <b>0.021</b>     | 1.781 (0.737-4.301)     | 0.200        |
| Age                                      | 1.038 (1.012-1.066)       | <b>0.004</b>     | 0.992 (0.959-1.026)     | 0.645        |
| Male                                     | 0.731 (0.384-1.390)       | 0.339            |                         |              |
| Primary prophylaxis                      | 1.951 (0.941-4.044)       | <b>0.072</b>     | 1.001 (0.379-2.643)     | 0.998        |
| Ischemic etiology                        | 1.522 (0.816-2.838)       | 0.187            |                         |              |
| Previously diagnosed atrial fibrillation | 3.822 (2.085-7.005)       | <b>&lt;0.001</b> | 4.300 (1.687-10.959)    | <b>0.002</b> |
| Hypertension                             | 3.185 (0.765-13.260)      | 0.111            |                         |              |
| Dyslipidaemia                            | 1.334 (0.617-2.881)       | 0.464            |                         |              |
| Diabetes mellitus                        | 1.344 (0.735-2.458)       | 0.337            |                         |              |
| Stroke/TIA                               | 0.451 (0.109-1.867)       | 0.272            |                         |              |
| Bradypacing indication                   | 2.195 (1.207-3.992)       | <b>0.010</b>     | 0.749 (0.216-2.601)     | 0.649        |
| LVEF                                     | 0.999 (0.981-1.018)       | 0.950            |                         |              |
| QRS width                                | 1.013 (0.999-1.026)       | <b>0.065</b>     | 0.998 (0.979-1.017)     | 0.833        |
| Heart rate                               | 1.019 (0.998-1.041)       | <b>0.075</b>     | 1.008 (0.974-1.043)     | 0.668        |
| Creatinine                               | 1.002 (0.997-1.007)       | 0.470            |                         |              |
| Hemoglobin                               | 0.995 (0.977-1.013)       | 0.582            |                         |              |
| Remote monitoring                        | 0.388 (0.200-0.751)       | <b>0.005</b>     | 0.323 (0.123-0.852)     | <b>0.022</b> |
| Antiplatelet therapy                     | 1.139 (0.609-2.131)       | 0.684            |                         |              |
| Anticoagulation                          | 2.723 (1.506-4.924)       | <b>0.001</b>     | 0.746 (0.295-1.883)     | 0.535        |
| Beta-blockers                            | 1.685 (0.520-5.456)       | 0.384            |                         |              |
| ACEI/ARB/ARNI                            | 1.043 (0.482-2.255)       | 0.915            |                         |              |
| Diuretics                                | 1.731 (0.953-3.147)       | <b>0.072</b>     | 4.105 (1.610-10.462)    | <b>0.003</b> |
| Calcium channel blockers                 | 1.043 (0.527-2.066)       | 0.903            |                         |              |
| Mineralocorticoid receptor antagonists   | 0.752 (0.403-1.405)       | 0.371            |                         |              |
| Statins                                  | 1.245 (0.638-2.431)       | 0.520            |                         |              |
| Amiodarone                               | 1.901 (0.930-3.886)       | <b>0.078</b>     | 1.178 (0.403-3.447)     | 0.765        |
| Digitalis glycosides                     | 3.043 (0.731-12.672)      | 0.126            |                         |              |

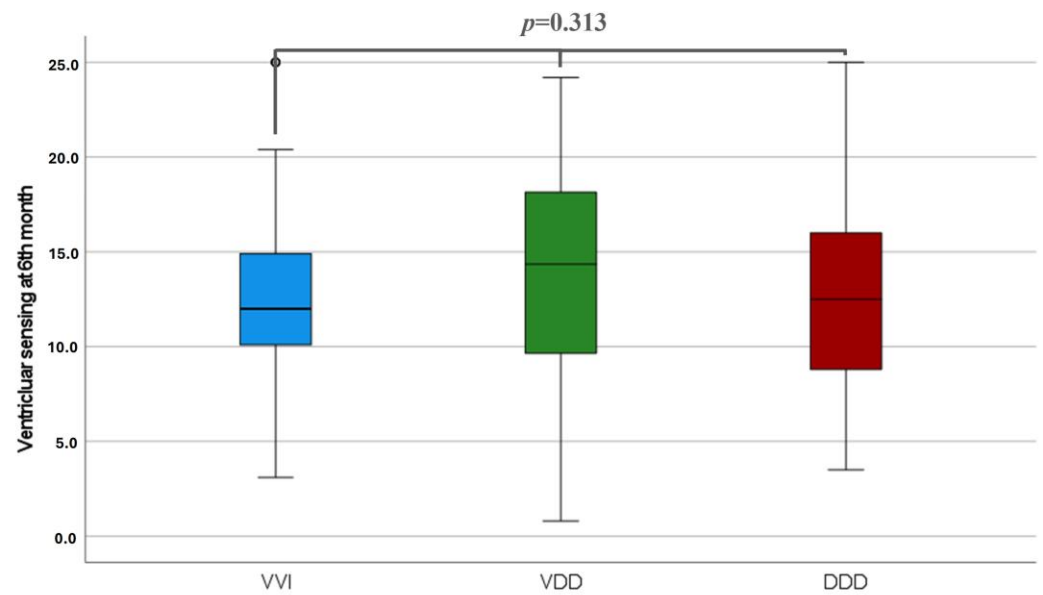

Figure S1 Ventricular sensing in VVI vs. VDD vs. DDD ICDs at 6th month

Table S5. Detailed distribution of device detected atrial arrhythmias

|                                                          | VVI<br>(N=93) | VDD<br>(N=94) | DDD<br>(N=69) | p-value |
|----------------------------------------------------------|---------------|---------------|---------------|---------|
| Total number of first device detected atrial arrhythmias | 4             | 18            | 28            |         |
| Paroxysmal atrial fibrillation (n, %)                    | 4 (100%)      | 15 (83%)      | 23 (82%)      |         |
| Persistent atrial fibrillation (n, %)                    | 0 (0%)        | 2 (11%)       | 1 (4%)        | 0.609   |
| Regular atrial arrhythmias (n, %)                        | 0 (0%)        | 1 (6%)        | 4 (14%)       |         |

Table S6. Subgroup analysis of complication rates

|                      | VVI<br>(N=93) | VDD<br>(N=94) | p-value |
|----------------------|---------------|---------------|---------|
| Complications (n, %) | 7 (8%)        | 12 (13%)      | 0.236   |
|                      | VVI<br>(N=93) | DDD<br>(N=69) | p-value |
| Complications (n, %) | 7 (8%)        | 14 (20%)      | 0.017   |
|                      | VDD<br>(N=94) | DDD<br>(N=69) | p-value |
| Complications (n, %) | 12 (13%)      | 14 (20%)      | 0.195   |

**Table S7.** Distribution of complications between all groups

|                                 | <b>VVI<br/>(N=93)</b> | <b>VDD<br/>(N=94)</b> | <b>DDD<br/>(N=69)</b> |
|---------------------------------|-----------------------|-----------------------|-----------------------|
| Superficial infection (n,%)     | 2 (2%)                | 5 (5%)                | 3 (4%)                |
| Pocket infection (n,%)          | 1 (1%)                | 0 (0%)                | 2 (3%)                |
| Systemic infection (n,%)        | 2 (2%)                | 0 (0%)                | 1 (1%)                |
| Hematoma (n,%)                  | 1 (1%)                | 2 (2%)                | 2 (3%)                |
| Deep venous thrombosis (n,%)    | 0 (0%)                | 0 (0%)                | 1 (1%)                |
| Lead-related complication (n,%) | 1 (1%)                | 5 (5%)                | 5 (7%)                |

**Table S8.** Multivariate analysis of time to first appropriate therapy - VVI vs. VDD

| <b>Risk factor</b>                       | <b>unadjusted HR<br/>(95% CI)</b> | <b>p-value</b> | <b>adjusted HR<br/>(95% CI)</b> | <b>p-value</b> |
|------------------------------------------|-----------------------------------|----------------|---------------------------------|----------------|
| ICD type                                 | 0.874 (0.574-1.332)               | <b>0.532</b>   | 0.983 (0.641-1.508)             | 0.937          |
| Age                                      | 1.023 (1.004-1.043)               | <b>0.019</b>   | 1.019 (0.999-1.039)             | 0.057          |
| Male                                     | 1.127 (0.691-1.838)               | 0.631          |                                 |                |
| Primary prophylaxis                      | 2.760 (1.533-4.972)               | <b>0.001</b>   | 2.204 (1.192-4.074)             | <b>0.012</b>   |
| Ischemic etiology                        | 0.893 (0.586-1.359)               | 0.597          |                                 |                |
| Previously diagnosed atrial fibrillation | 0.920 (0.577-1.469)               | 0.728          |                                 |                |
| Hypertension                             | 1.050 (0.483-2.281)               | 0.902          |                                 |                |
| Dyslipidaemia                            | 1.275 (0.678-2.398)               | 0.450          |                                 |                |
| Diabetes mellitus                        | 0.812 (0.512-1.287)               | 0.375          |                                 |                |
| Stroke/TIA                               | 0.942 (0.455-1.950)               | 0.873          |                                 |                |
| Bradypacing indication                   | 0.634 (0.088-4.562)               | 0.651          |                                 |                |
| LVEF                                     | 1.000 (0.985-1.014)               | 0.949          |                                 |                |
| QRS width                                | 1.003 (0.991-1.014)               | 0.655          |                                 |                |
| Heart rate                               | 0.993 (0.978-1.009)               | 0.376          |                                 |                |
| Creatinine                               | 1.003 (0.998-1.008)               | 0.194          |                                 |                |
| Hemoglobin                               | 1.000 (0.987-1.014)               | 0.950          |                                 |                |
| Remote monitoring                        | 0.895 (0.565-1.419)               | 0.637          |                                 |                |
| Antiplatelet therapy                     | 0.882 (0.577-1.349)               | 0.563          |                                 |                |
| Anticoagulation                          | 0.827 (0.540-1.266)               | 0.381          |                                 |                |
| Beta-blockers                            | 0.255 (0.103-0.636)               | <b>0.003</b>   | 0.256 (0.101-0.648)             | <b>0.004</b>   |
| ACEI/ARB/ARNI                            | 1.140 (0.572-2.271)               | 0.710          |                                 |                |
| Diuretics                                | 1.172 (0.775-1.772)               | 0.452          |                                 |                |
| Calcium channel blockers                 | 1.736 (1.088-2.770)               | <b>0.021</b>   | 1.352 (0.837-2.184)             | 0.218          |
| Mineralocorticoid receptor antagonists   | 0.975 (0.646-1.473)               | 0.906          |                                 |                |
| Statins                                  | 0.719 (0.464-1.114)               | 0.139          |                                 |                |
| Amiodarone                               | 1.691 (1.051-2.721)               | <b>0.030</b>   | 1.521 (0.926-2.498)             | 0.098          |
| Digitalis glycosides                     | 0.618 (0.270-1.416)               | 0.255          |                                 |                |

**Table S9.** Multivariate analysis of time to first appropriate therapy - VDD vs. DDD

| <b>Risk factor</b>                          | <b>unadjusted HR<br/>(95% CI)</b> | <b>p-value</b>   | <b>adjusted HR<br/>(95% CI)</b> | <b>p-value</b> |
|---------------------------------------------|-----------------------------------|------------------|---------------------------------|----------------|
| ICD type                                    | 0.611 (0.359-1.040)               | <b>0.069</b>     | 0.651 (0.371-1.142)             | 0.135          |
| Age                                         | 1.012 (0.991-1.033)               | 0.240            |                                 |                |
| Male                                        | 1.088 (0.597-1.983)               | 0.784            |                                 |                |
| Primary prophylaxis                         | 3.488 (1.714-7.097)               | <b>&lt;0.001</b> | 3.341 (1.564-7.138)             | <b>0.002</b>   |
| Ischemic etiology                           | 1.330 (0.782-2.262)               | 0.293            |                                 |                |
| Previously diagnosed atrial<br>fibrillation | 0.954 (0.548-1.663)               | 0.869            |                                 |                |
| Hypertension                                | 1.353 (0.489-3.745)               | 0.560            |                                 |                |
| Dyslipidaemia                               | 1.645 (0.779-3.473)               | 0.192            |                                 |                |
| Diabetes mellitus                           | 0.785 (0.446-1.382)               | 0.401            |                                 |                |
| Stroke/TIA                                  | 0.641 (0.232-1.771)               | 0.391            |                                 |                |
| Bradypacing indication                      | 0.523 (0.265-1.035)               | <b>0.063</b>     | 0.721 (0.315-1.650)             | 0.439          |
| LVEF                                        | 0.992 (0.976-1.008)               | 0.336            |                                 |                |
| QRS width                                   | 0.999 (0.987-1.011)               | 0.883            |                                 |                |
| Heart rate                                  | 0.993 (0.974-1.011)               | 0.438            |                                 |                |
| Creatinine                                  | 1.002 (0.996-1.008)               | 0.560            |                                 |                |
| Hemoglobin                                  | 1.002 (0.986-1.018)               | 0.822            |                                 |                |
| Remote monitoring                           | 1.420 (0.850-2.371)               | 0.181            |                                 |                |
| Antiplatelet therapy                        | 0.898 (0.529-1.526)               | 0.691            |                                 |                |
| Anticoagulation                             | 1.269 (0.752-2.141)               | 0.371            |                                 |                |
| Beta-blockers                               | 1.301 (0.470-3.603)               | 0.612            |                                 |                |
| ACEI/ARB/ARNI                               | 0.971 (0.476-1.983)               | 0.936            |                                 |                |
| Diuretics                                   | 1.146 (0.681-1.927)               | 0.608            |                                 |                |
| Calcium channel blockers                    | 1.483 (0.840-2.617)               | 0.174            |                                 |                |
| Mineralocorticoid receptor<br>antagonists   | 0.962 (0.562-1.647)               | 0.888            |                                 |                |
| Statins                                     | 0.912 (0.521-1.594)               | 0.745            |                                 |                |
| Amiodarone                                  | 2.480 (1.374-4.479)               | <b>0.003</b>     | 1.949 (1.073-3.540)             | <b>0.028</b>   |
| Digitalis glycosides                        | 0.046 (0.000-11.224)              | 0.272            |                                 |                |

**Table S10.** Multivariate analysis of time to first inappropriate therapy - VVI vs. VDD

| <b>Risk factor</b>                          | <b>unadjusted HR<br/>(95% CI)</b> | <b>p-value</b> | <b>adjusted HR<br/>(95% CI)</b> | <b>p-value</b> |
|---------------------------------------------|-----------------------------------|----------------|---------------------------------|----------------|
| ICD type                                    | 0.782 (0.338-1.811)               | <b>0.566</b>   | 0.742 (0.313-1.757)             | 0.497          |
| Age                                         | 0.994 (0.960-1.029)               | 0.729          |                                 |                |
| Male                                        | 0.613 (0.262-1.434)               | 0.259          |                                 |                |
| Primary prophylaxis                         | 0.938 (0.372-2.365)               | 0.892          |                                 |                |
| Ischemic etiology                           | 0.527 (0.236-1.178)               | 0.119          |                                 |                |
| Previously diagnosed atrial<br>fibrillation | 1.111 (0.459-2.689)               | 0.816          |                                 |                |
| Hypertension                                | 0.588 (0.173-1.996)               | 0.395          |                                 |                |
| Dyslipidaemia                               | 0.332 (0.142-0.777)               | <b>0.011</b>   | 0.533 (0.213-1.332)             | 0.178          |
| Diabetes mellitus                           | 0.592 (0.221-1.586)               | 0.297          |                                 |                |
| Stroke/TIA                                  | 0.043 (0.000-24.731)              | 0.332          |                                 |                |
| Bradypacing indication                      | 0.048 (0.000-<br>132902.528)      | 0.689          |                                 |                |
| LVEF                                        | 0.984 (0.952-1.016)               | 0.322          |                                 |                |
| QRS width                                   | 1.006 (0.982-1.031)               | 0.637          |                                 |                |
| Heart rate                                  | 1.007 (0.980-1.034)               | 0.628          |                                 |                |
| Creatinine                                  | 1.002 (0.996-1.009)               | 0.482          |                                 |                |
| Hemoglobin                                  | 1.011 (0.984-1.039)               | 0.430          |                                 |                |
| Remote monitoring                           | 0.717 (0.284-1.808)               | 0.480          |                                 |                |
| Antiplatelet therapy                        | 0.365 (0.161-0.824)               | <b>0.015</b>   | 0.327 (0.142-0.753)             | <b>0.009</b>   |
| Anticoagulation                             | 1.519 (0.677-3.410)               | 0.311          |                                 |                |
| Beta-blockers                               | 0.240 (0.056-1.026)               | <b>0.054</b>   | 0.167 (0.037-0.742)             | <b>0.019</b>   |
| ACEI/ARB/ARNI                               | 0.406 (0.151-1.088)               | <b>0.073</b>   | 0.667 (0.214-2.078)             | 0.485          |
| Diuretics                                   | 1.419 (0.630-3.197)               | 0.398          |                                 |                |
| Calcium channel blockers                    | 0.525 (0.156-1.761)               | 0.297          |                                 |                |
| Mineralocorticoid receptor<br>antagonists   | 1.131 (0.506-2.530)               | 0.764          |                                 |                |
| Statins                                     | 0.464 (0.207-1.036)               | <b>0.061</b>   | 1.158 (0.339-3.955)             | 0.815          |
| Amiodarone                                  | 0.938 (0.321-2.747)               | 0.908          |                                 |                |
| Digitalis glycosides                        | 1.602 (0.477-5.377)               | 0.446          |                                 |                |

**Table S11.** Multivariate analysis of time to first inappropriate therapy - VDD vs. DDD

| <b>Risk factor</b>                          | <b>unadjusted HR<br/>(95% CI)</b> | <b>p-value</b> | <b>adjusted HR<br/>(95% CI)</b> | <b>p-value</b> |
|---------------------------------------------|-----------------------------------|----------------|---------------------------------|----------------|
| ICD type                                    | 0.710 (0.249-2.024)               | <b>0.522</b>   | 0.618 (0.203-1.878)             | 0.396          |
| Age                                         | 0.986 (0.955-1.019)               | 0.399          |                                 |                |
| Male                                        | 1.396 (0.397-4.907)               | 0.603          |                                 |                |
| Primary prophylaxis                         | 1.927 (0.548-6.774)               | 0.307          |                                 |                |
| Ischemic etiology                           | 0.483 (0.179-1.306)               | 0.152          |                                 |                |
| Previously diagnosed atrial<br>fibrillation | 1.703 (0.599-4.839)               | 0.318          |                                 |                |
| Hypertension                                | 1.753 (0.229-13.404)              | 0.589          |                                 |                |
| Dyslipidaemia                               | 1.090 (0.309-3.847)               | 0.893          |                                 |                |
| Diabetes mellitus                           | 0.624 (0.199-1.957)               | 0.418          |                                 |                |
| Stroke/TIA                                  | 0.042 (0.000-58.362)              | 0.390          |                                 |                |
| Bradypacing indication                      | 0.383 (0.086-1.705)               | 0.208          |                                 |                |
| LVEF                                        | 0.988 (0.956-1.022)               | 0.491          |                                 |                |
| QRS width                                   | 1.000 (0.974-1.025)               | 0.971          |                                 |                |
| Heart rate                                  | 0.974 (0.936-1.014)               | 0.197          |                                 |                |
| Creatinine                                  | 1.002 (0.994-1.011)               | 0.558          |                                 |                |
| Hemoglobin                                  | 1.030 (0.988-1.074)               | 0.158          |                                 |                |
| Remote monitoring                           | 0.783 (0.284-2.159)               | 0.636          |                                 |                |
| Antiplatelet therapy                        | 0.484 (0.175-1.340)               | 0.162          |                                 |                |
| Anticoagulation                             | 2.314 (0.796-6.723)               | 0.123          |                                 |                |
| Beta-blockers                               | 0.751 (0.168-3.366)               | 0.708          |                                 |                |
| ACEI/ARB/ARNI                               | 0.843 (0.237-3.001)               | 0.792          |                                 |                |
| Diuretics                                   | 1.754 (0.623-4.937)               | 0.287          |                                 |                |
| Calcium channel blockers                    | 1.018 (0.323-3.212)               | 0.976          |                                 |                |
| Mineralocorticoid receptor<br>antagonists   | 2.211 (0.761-6.424)               | 0.145          |                                 |                |
| Statins                                     | 0.606 (0.215-1.708)               | 0.344          |                                 |                |
| Amiodarone                                  | 1.457 (0.404-5.249)               | 0.565          |                                 |                |
| Digitalis glycosides                        | 5.246 (1.169-23.545)              | <b>0.030</b>   | 5.246 (1.169-23.545)            | <b>0.030</b>   |



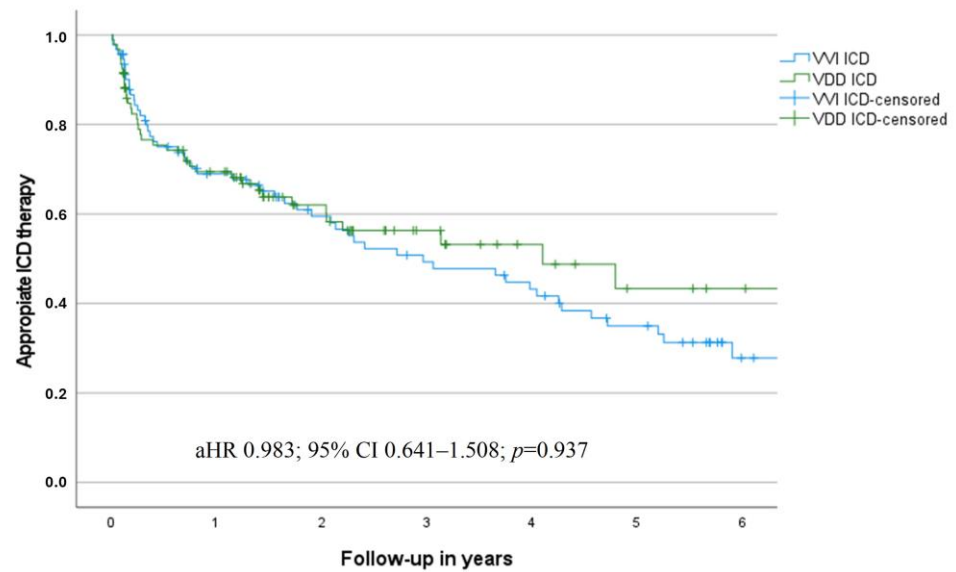

| Patients at risk | 1 year | 2 years | 3 years | 4 years | 5 years | 6 years | 7 years |
|------------------|--------|---------|---------|---------|---------|---------|---------|
| VVI              | 93     | 55      | 41      | 33      | 28      | 20      | 7       |
| VDD              | 94     | 56      | 33      | 19      | 12      | 7       | 5       |

Figure S2A Time to first appropriate therapy – VVI vs. VDD

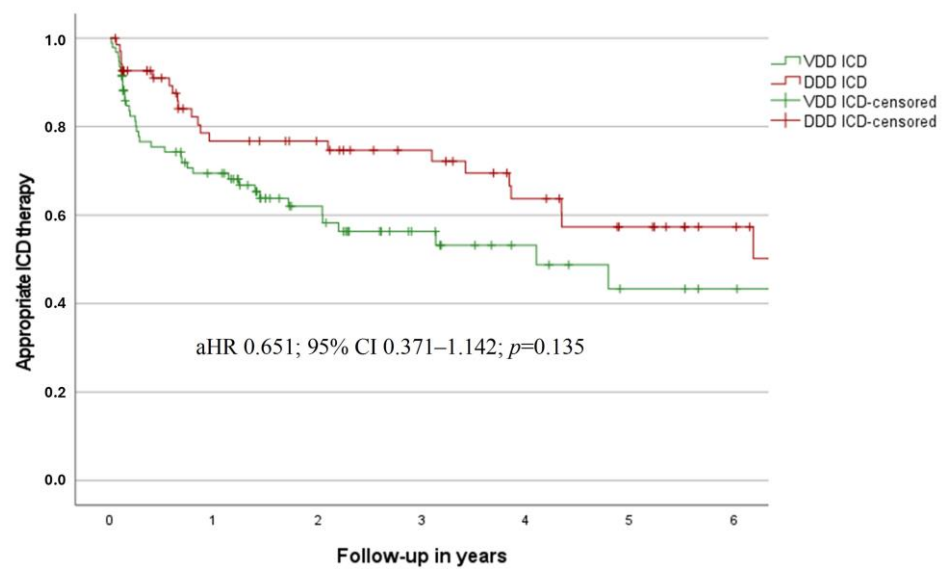

| Patients at risk | 1 year | 2 years | 3 years | 4 years | 5 years | 6 years | 7 years |
|------------------|--------|---------|---------|---------|---------|---------|---------|
| VDD              | 94     | 56      | 33      | 19      | 12      | 7       | 5       |
| DDD              | 69     | 42      | 37      | 30      | 22      | 16      | 10      |

Figure S2B Time to first appropriate therapy – VDD vs. DDD

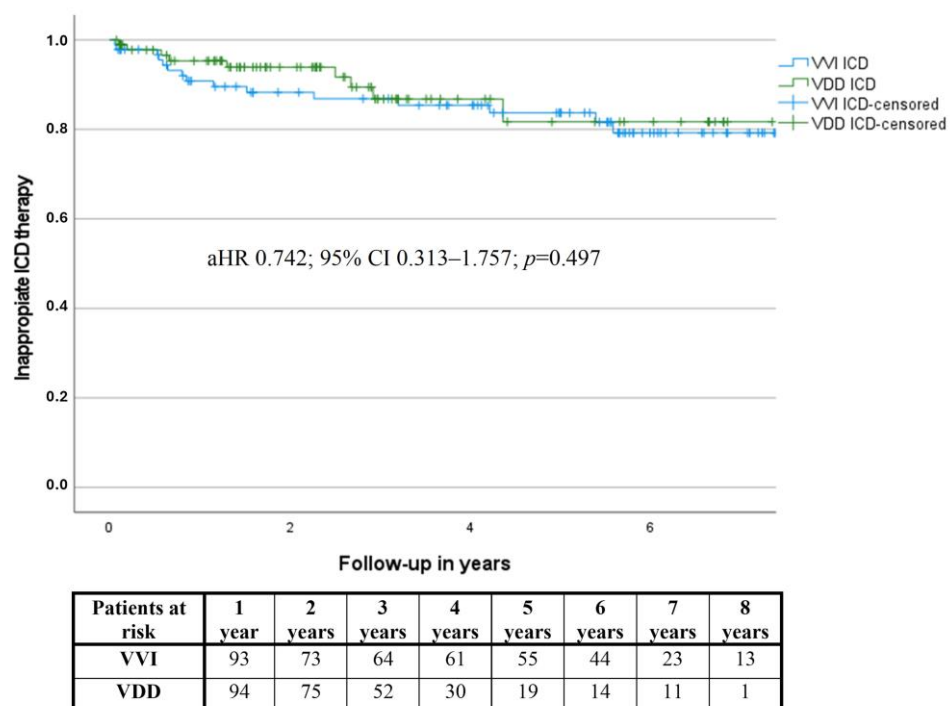

Figure S2C Time to first inappropriate therapy – VVI vs. VDD

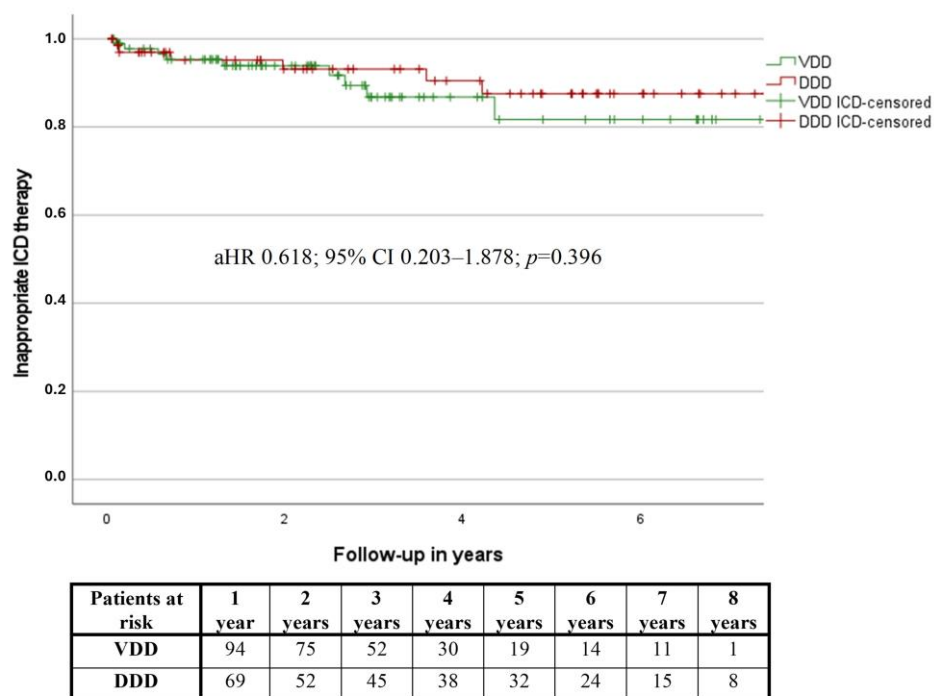

Figure S2D Time to first inappropriate therapy – VDD vs. DDD

**Table S12.** Multivariate analysis of time to first hospitalization due to arrhythmic cause - VVI vs. VDD

| <b>Risk factor</b>                          | <b>unadjusted HR<br/>(95% CI)</b> | <b>p-value</b> | <b>adjusted HR<br/>(95% CI)</b> | <b>p-value</b> |
|---------------------------------------------|-----------------------------------|----------------|---------------------------------|----------------|
| ICD type                                    | 1.463 (0.899-2.379)               | <b>0.125</b>   | 1.706 (1.043-2.792)             | <b>0.033</b>   |
| Age                                         | 1.009 (0.988-1.031)               | 0.390          |                                 |                |
| Male                                        | 0.733 (0.430-1.248)               | 0.253          |                                 |                |
| Primary prophylaxis                         | 2.804 (1.339-5.869)               | <b>0.006</b>   | 3.041 (1.443-6.411)             | <b>0.003</b>   |
| Ischemic etiology                           | 0.770 (0.475-1.248)               | 0.289          |                                 |                |
| Previously diagnosed atrial<br>fibrillation | 0.981 (0.576-1.671)               | 0.943          |                                 |                |
| Hypertension                                | 0.939 (0.376-2.348)               | 0.893          |                                 |                |
| Dyslipidaemia                               | 1.410 (0.672-2.957)               | 0.363          |                                 |                |
| Diabetes mellitus                           | 1.380 (0.840-2.267)               | 0.203          |                                 |                |
| Stroke/TIA                                  | 0.881 (0.353-2.198)               | 0.786          |                                 |                |
| Bradypacing indication                      | 1.258 (0.174-9.096)               | 0.820          |                                 |                |
| LVEF                                        | 0.995 (0.977-1.013)               | 0.555          |                                 |                |
| QRS width                                   | 0.995 (0.981-1.009)               | 0.491          |                                 |                |
| Heart rate                                  | 0.991 (0.973-1.009)               | 0.328          |                                 |                |
| Creatinine                                  | 1.004 (0.999-1.008)               | 0.104          |                                 |                |
| Hemoglobin                                  | 0.996 (0.982-1.011)               | 0.620          |                                 |                |
| Remote monitoring                           | 1.394 (0.848-2.289)               | 0.190          |                                 |                |
| Antiplatelet therapy                        | 1.054 (0.639-1.737)               | 0.838          |                                 |                |
| Anticoagulation                             | 0.760 (0.459-1.260)               | 0.288          |                                 |                |
| Beta-blockers                               | 0.806 (0.197-3.300)               | 0.764          |                                 |                |
| ACEI/ARB/ARNI                               | 0.415 (0.226-0.761)               | <b>0.004</b>   | 0.404 (0.219-0.745)             | <b>0.004</b>   |
| Diuretics                                   | 0.939 (0.581-1.518)               | 0.797          |                                 |                |
| Calcium channel blockers                    | 1.555 (0.905-2.672)               | 0.110          |                                 |                |
| Mineralocorticoid receptor<br>antagonists   | 0.803 (0.495-1.302)               | 0.374          |                                 |                |
| Statins                                     | 0.867 (0.520-1.444)               | 0.583          |                                 |                |
| Amiodarone                                  | 1.618 (0.942-2.778)               | <b>0.081</b>   | 1.277 (0.734-2.220)             | 0.387          |
| Digitalis glycosides                        | 0.619 (0.225-1.703)               | 0.353          |                                 |                |

**Table S13.** Multivariate analysis of time to first hospitalization due to arrhythmic cause - VDD vs. DDD

| <b>Risk factor</b>                          | <b>unadjusted HR<br/>(95% CI)</b> | <b>p-value</b> | <b>adjusted HR<br/>(95% CI)</b> | <b>p-value</b> |
|---------------------------------------------|-----------------------------------|----------------|---------------------------------|----------------|
| ICD type                                    | 0.638 (0.366-1.113)               | <b>0.114</b>   | 0.700 (0.365-1.341)             | 0.282          |
| Age                                         | 1.009 (0.987-1.030)               | 0.429          |                                 |                |
| Male                                        | 0.960 (0.523-1.761)               | 0.895          |                                 |                |
| Primary prophylaxis                         | 1.523 (0.830-2.796)               | 0.175          |                                 |                |
| Ischemic etiology                           | 0.936 (0.548-1.601)               | 0.810          |                                 |                |
| Previously diagnosed atrial<br>fibrillation | 1.106 (0.628-1.949)               | 0.727          |                                 |                |
| Hypertension                                | 1.694 (0.527-5.439)               | 0.376          |                                 |                |
| Dyslipidaemia                               | 1.117 (0.561-2.221)               | 0.753          |                                 |                |
| Diabetes mellitus                           | 1.221 (0.709-2.103)               | 0.472          |                                 |                |
| Stroke/TIA                                  | 0.643 (0.231-1.785)               | 0.396          |                                 |                |
| Bradypacing indication                      | 0.647 (0.332-1.261)               | 0.201          |                                 |                |
| LVEF                                        | 0.986 (0.969-1.004)               | 0.117          |                                 |                |
| QRS width                                   | 1.002 (0.990-1.014)               | 0.786          |                                 |                |
| Heart rate                                  | 0.983 (0.962-1.003)               | 0.101          |                                 |                |
| Creatinine                                  | 1.005 (1.000-1.009)               | <b>0.041</b>   | 1.005 (1.000-1.009)             | <b>0.049</b>   |
| Hemoglobin                                  | 1.005 (0.988-1.022)               | 0.594          |                                 |                |
| Remote monitoring                           | 1.466 (0.862-2.492)               | 0.158          |                                 |                |
| Antiplatelet therapy                        | 1.012 (0.586-1.746)               | 0.967          |                                 |                |
| Anticoagulation                             | 1.118 (0.651-1.920)               | 0.686          |                                 |                |
| Beta-blockers                               | 1.464 (0.525-4.086)               | 0.466          |                                 |                |
| ACEI/ARB/ARNI                               | 0.764 (0.384-1.519)               | 0.442          |                                 |                |
| Diuretics                                   | 1.199 (0.706-2.037)               | 0.501          |                                 |                |
| Calcium channel blockers                    | 1.748 (1.001-3.051)               | <b>0.050</b>   | 1.412 (0.770-2.589)             | 0.265          |
| Mineralocorticoid receptor<br>antagonists   | 0.710 (0.398-1.265)               | 0.245          |                                 |                |
| Statins                                     | 0.788 (0.451-1.379)               | 0.404          |                                 |                |
| Amiodarone                                  | 2.744 (1.513-4.976)               | <b>0.001</b>   | 2.761 (1.461-5.218)             | <b>0.002</b>   |
| Digitalis glycosides                        | 0.885 (0.215-3.640)               | 0.865          |                                 |                |

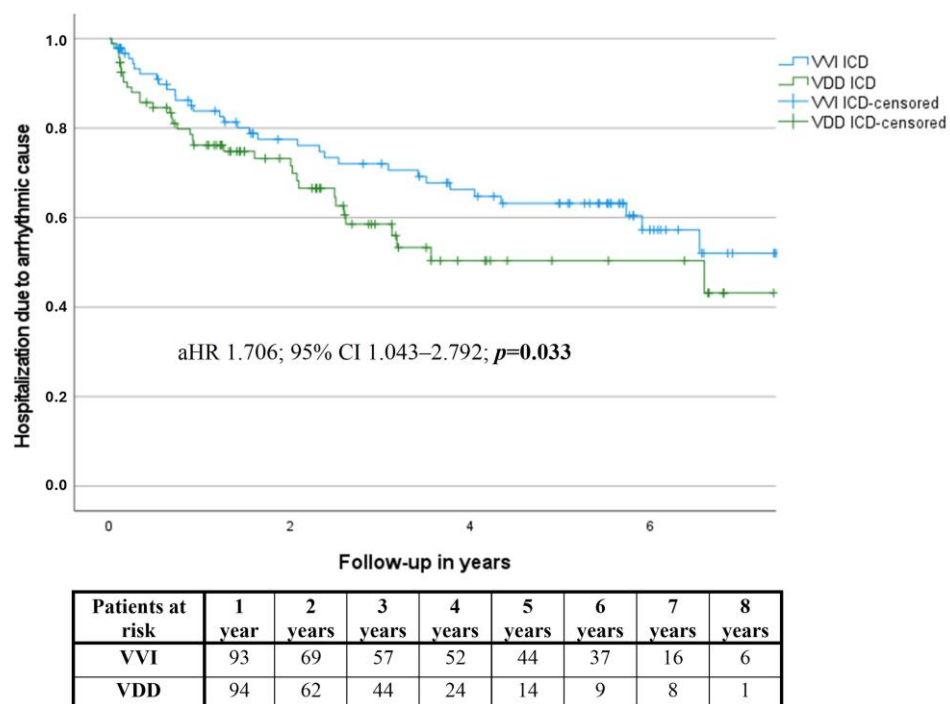

Figure S3A Time to first hospitalization due to arrhythmic cause – VVI vs. VDD

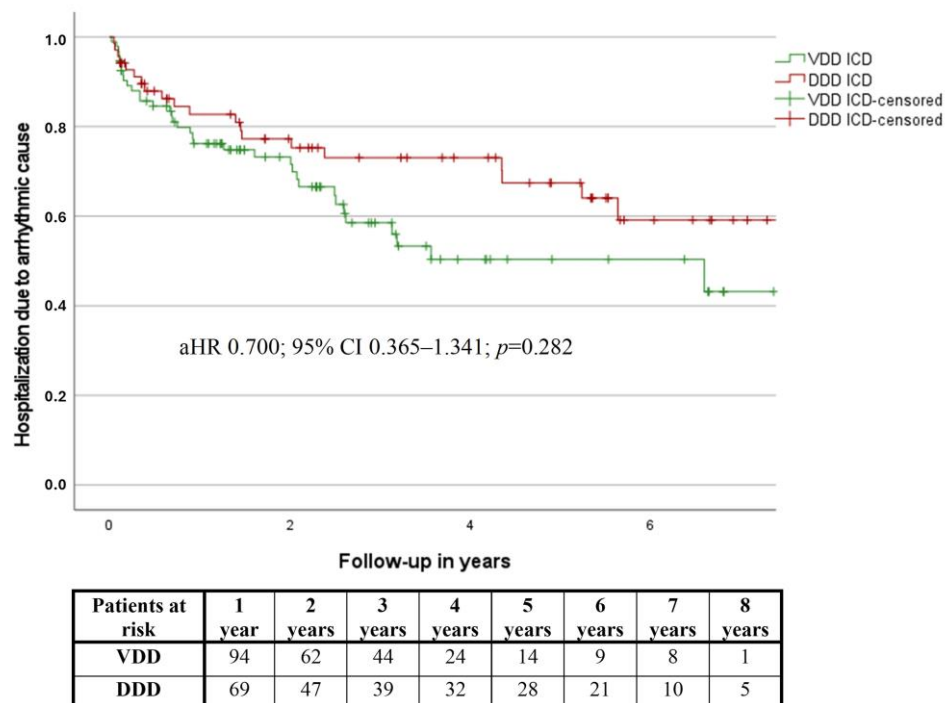

Figure S3B Time to first hospitalization due to arrhythmic cause – VDD vs. DDD

**Table S14.** Arrhythmia-related hospitalization events in the different groups

|                                                                                                                                          | VVI<br>(N=93) | VDD<br>(N=94) | DDD<br>(N=69) |
|------------------------------------------------------------------------------------------------------------------------------------------|---------------|---------------|---------------|
| Total number of first arrhythmia-related hospitalization events                                                                          | 32            | 35            | 21            |
| <i>Admission due to ventricular tachycardia or electric storm (n, %)</i>                                                                 | 27 (84%)      | 23 (66%)      | 10 (48%)      |
| <i>Admission due to management of supraventricular tachycardia (including elective admission due to ECV or catheter ablation) (n, %)</i> | 3 (10%)       | 8 (23%)       | 5 (24%)       |
| <i>Admission due to other causes (electrode malfunction, BIV-upgrade, syncope, etc.)</i>                                                 | 2 (6%)        | 4 (11%)       | 6 (28%)       |

**Table S15.** Multivariate analysis of time to first hospitalization due to heart failure - VVI vs. VDD

| Risk factor                              | unadjusted HR<br>(95% CI) | p-value      | adjusted HR<br>(95% CI) | p-value          |
|------------------------------------------|---------------------------|--------------|-------------------------|------------------|
| ICD type                                 | 0.949 (0.449-2.006)       | <b>0.891</b> | 1.628 (0.619-4.279)     | 0.323            |
| Age                                      | 0.989 (0.959-1.020)       | 0.477        |                         |                  |
| Male                                     | 0.670 (0.305-1.474)       | 0.320        |                         |                  |
| Primary prophylaxis                      | 0.330 (0.159-0.685)       | <b>0.003</b> | 0.399 (0.136-1.170)     | 0.094            |
| Ischemic etiology                        | 0.809 (0.389-1.681)       | 0.570        |                         |                  |
| Previously diagnosed atrial fibrillation | 2.329 (1.114-4.867)       | <b>0.025</b> | 2.160 (0.670-6.967)     | 0.197            |
| Hypertension                             | 0.660 (0.198-2.197)       | 0.499        |                         |                  |
| Dyslipidaemia                            | 1.584 (0.478-5.252)       | 0.452        |                         |                  |
| Diabetes mellitus                        | 1.712 (0.816-3.590)       | 0.155        |                         |                  |
| Stroke/TIA                               | 2.544 (0.959-6.745)       | <b>0.061</b> | 1.980 (0.628-6.240)     | 0.243            |
| Bradypacing indication                   | 0.048 (0.000-52297.115)   | 0.669        |                         |                  |
| LVEF                                     | 0.957 (0.925-0.990)       | <b>0.011</b> | 1.002 (0.961-1.045)     | 0.917            |
| QRS width                                | 1.005 (0.985-1.025)       | 0.645        |                         |                  |
| Heart rate                               | 1.021 (1.000-1.042)       | <b>0.046</b> | 1.023 (0.997-1.051)     | 0.087            |
| Creatinine                               | 1.010 (1.003-1.017)       | <b>0.005</b> | 1.012 (1.004-1.020)     | <b>0.003</b>     |
| Hemoglobin                               | 0.973 (0.954-0.993)       | <b>0.009</b> | 0.958 (0.937-0.980)     | <b>&lt;0.001</b> |
| Remote monitoring                        | 0.697 (0.297-1.635)       | 0.407        |                         |                  |
| Antiplatelet therapy                     | 0.692 (0.333-1.439)       | 0.324        |                         |                  |
| Anticoagulation                          | 1.875 (0.900-3.908)       | <b>0.093</b> | 0.649 (0.239-1.764)     | 0.397            |
| Beta-blockers                            | 21.124 (0.002-267352.000) | 0.527        |                         |                  |
| ACEI/ARB/ARNI                            | 0.501 (0.191-1.314)       | 0.160        |                         |                  |
| Diuretics                                | 2.801 (1.237-6.339)       | <b>0.013</b> | 1.378 (0.460-4.130)     | 0.567            |
| Calcium channel blockers                 | 0.414 (0.125-1.368)       | 0.414        |                         |                  |
| Mineralocorticoid receptor antagonists   | 3.849 (1.561-9.489)       | <b>0.003</b> | 2.827 (0.934-8.560)     | 0.066            |
| Statins                                  | 0.566 (0.270-1.186)       | 0.132        |                         |                  |

|                      |                      |        |                      |       |
|----------------------|----------------------|--------|----------------------|-------|
| Amiodarone           | 0.719 (0.250-2.067)  | 0.719  |                      |       |
| Digitalis glycosides | 4.770 (2.097-10.848) | <0.001 | 3.521 (1.224-10.132) | 0.020 |

**Table S16.** Multivariate analysis of time to first hospitalization due to heart failure - VDD vs. DDD

| Risk factor                                 | unadjusted HR<br>(95% CI)    | p-value      | adjusted HR<br>(95% CI) | p-value      |
|---------------------------------------------|------------------------------|--------------|-------------------------|--------------|
| ICD type                                    | 0.586 (0.219-1.570)          | <b>0.287</b> | 0.949 (0.301-2.991)     | 0.928        |
| Age                                         | 0.987 (0.957-1.019)          | 0.436        |                         |              |
| Male                                        | 0.633 (0.237-1.689)          | 0.362        |                         |              |
| Primary prophylaxis                         | 0.379 (0.150-0.962)          | <b>0.041</b> | 0.413 (0.151-1.126)     | 0.084        |
| Ischemic etiology                           | 0.870 (0.343-2.206)          | 0.769        |                         |              |
| Previously diagnosed atrial<br>fibrillation | 1.556 (0.596-4.060)          | 0.366        |                         |              |
| Hypertension                                | 0.757 (0.172-3.326)          | 0.712        |                         |              |
| Dyslipidaemia                               | 0.858 (0.280-2.627)          | 0.789        |                         |              |
| Diabetes mellitus                           | 1.042 (0.391-2.781)          | 0.934        |                         |              |
| Stroke/TIA                                  | 1.141 (0.262-4.971)          | 0.860        |                         |              |
| Bradypacing indication                      | 0.817 (0.268-2.487)          | 0.722        |                         |              |
| LVEF                                        | 0.941 (0.903-0.980)          | <b>0.003</b> | 0.957 (0.922-0.993)     | <b>0.019</b> |
| QRS width                                   | 0.999 (0.977-1.021)          | 0.895        |                         |              |
| Heart rate                                  | 1.002 (0.972-1.033)          | 0.887        |                         |              |
| Creatinine                                  | 1.010 (1.003-1.018)          | <b>0.003</b> | 1.011 (1.003-1.018)     | <b>0.005</b> |
| Hemoglobin                                  | 0.984 (0.958-1.011)          | 0.244        |                         |              |
| Remote monitoring                           | 0.812 (0.314-2.101)          | 0.668        |                         |              |
| Antiplatelet therapy                        | 0.736 (0.290-1.867)          | 0.519        |                         |              |
| Anticoagulation                             | 1.010 (0.389-2.622)          | 0.983        |                         |              |
| Beta-blockers                               | 23.676 (0.024-<br>23075.647) | 0.367        |                         |              |
| ACEI/ARB/ARNI                               | 0.635 (0.208-1.933)          | 0.423        |                         |              |
| Diuretics                                   | 1.744 (0.676-4.501)          | 0.250        |                         |              |
| Calcium channel blockers                    | 0.364 (0.084-1.584)          | 0.178        |                         |              |
| Mineralocorticoid receptor<br>antagonists   | 1.901 (0.746-4.840)          | 0.178        |                         |              |
| Statins                                     | 0.666 (0.258-1.719)          | 0.401        |                         |              |
| Amiodarone                                  | 1.079 (0.310-3.762)          | 0.904        |                         |              |
| Digitalis glycosides                        | 1.572 (0.209-11.839)         | 0.661        |                         |              |

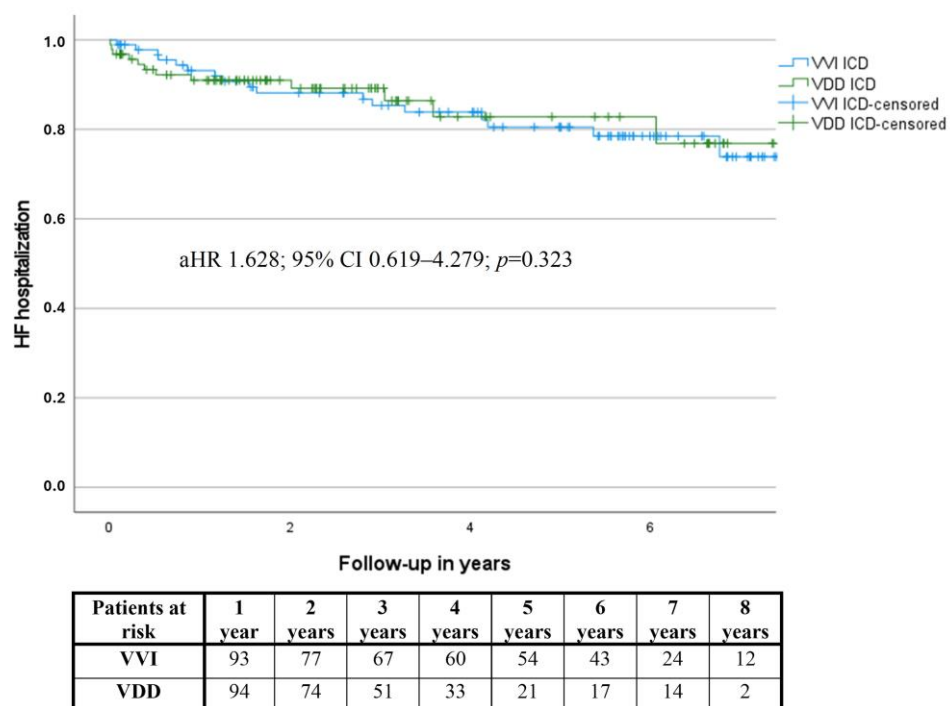

Figure S4A Time to first heart failure (HF) hospitalization – VVI vs. VDD

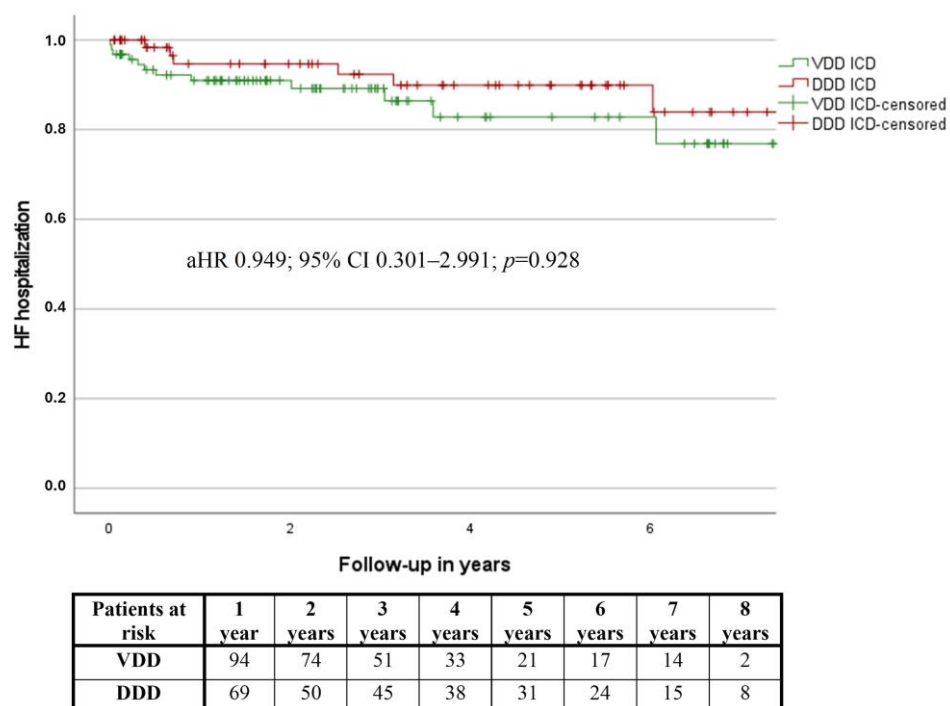

Figure S4B Time to first HF hospitalization – VDD vs. DDD



**Table S17.** Multivariate analysis of all-cause mortality - all groups

| Risk factor                                 | unadjusted HR<br>(95% CI) | p-value          | adjusted HR<br>(95% CI) | p-value          |
|---------------------------------------------|---------------------------|------------------|-------------------------|------------------|
| ICD type                                    | 0.906 (0.696-1.179)       | <b>0.463</b>     | 0.960 (0.711-1.295)     | 0.787            |
| Age                                         | 1.060 (1.037-1.084)       | <b>&lt;0.001</b> | 1.060 (1.031-1.089)     | <b>&lt;0.001</b> |
| Male                                        | 0.883 (0.546-1.426)       | 0.611            |                         |                  |
| Primary prophylaxis                         | 0.849 (0.534-1.349)       | 0.488            |                         |                  |
| Ischemic etiology                           | 1.297 (0.830-2.028)       | 0.253            |                         |                  |
| Previously diagnosed atrial<br>fibrillation | 1.958 (1.268-3.023)       | <b>0.002</b>     | 1.536 (0.936-2.521)     | 0.089            |
| Hypertension                                | 4.969 (1.220-20.233)      | <b>0.025</b>     | 1.177 (0.272-5.094)     | 0.828            |
| Dyslipidaemia                               | 1.645 (0.872-3.105)       | 0.125            |                         |                  |
| Diabetes mellitus                           | 1.968 (1.277-3.033)       | <b>0.002</b>     | 2.215 (1.361-3.607)     | <b>0.001</b>     |
| Stroke/TIA                                  | 1.409 (0.726-2.733)       | 0.311            |                         |                  |
| Bradypacing indication                      | 1.035 (0.575-1.864)       | 0.908            |                         |                  |
| LVEF                                        | 0.975 (0.959-0.991)       | <b>0.002</b>     | 0.967 (0.948-0.986)     | <b>0.001</b>     |
| QRS width                                   | 1.008 (0.997-1.018)       | 0.146            |                         |                  |
| Heart rate                                  | 1.017 (1.003-1.030)       | <b>0.013</b>     | 1.005 (0.992-1.018)     | 0.460            |
| Creatinine                                  | 1.002 (0.997-1.006)       | 0.486            |                         |                  |
| Hemoglobin                                  | 0.990 (0.977-1.004)       | 0.163            |                         |                  |
| Remote monitoring                           | 0.248 (0.114-0.538)       | <b>&lt;0.001</b> | 0.320 (0.145-0.709)     | <b>0.005</b>     |
| Antiplatelet therapy                        | 0.948 (0.603-1.489)       | 0.816            |                         |                  |
| Anticoagulation                             | 1.840 (1.190-2.843)       | <b>0.006</b>     | 1.172 (0.637-2.158)     | 0.609            |
| Beta-blockers                               | 0.935 (0.407-2.152)       | 0.875            |                         |                  |
| ACEI/ARB/ARNI                               | 1.023 (0.554-1.889)       | 0.942            |                         |                  |
| Diuretics                                   | 1.740 (1.111-2.725)       | <b>0.015</b>     | 1.451 (0.855-2.463)     | 0.167            |
| Calcium channel blockers                    | 0.888 (0.519-1.519)       | 0.666            |                         |                  |
| Mineralocorticoid receptor<br>antagonists   | 1.347 (0.870-2.085)       | 0.182            |                         |                  |
| Statins                                     | 1.114 (0.686-1.808)       | 0.662            |                         |                  |
| Amiodarone                                  | 1.244 (0.729-2.125)       | 0.423            |                         |                  |
| Digitalis glycosides                        | 1.021 (0.470-2.220)       | 0.958            |                         |                  |

**Table S18.** Distribution of structural heart diseases between all groups

|                                                          | VVI<br>(N=93) | VDD<br>(N=94) | DDD<br>(N=69) |
|----------------------------------------------------------|---------------|---------------|---------------|
| Ischemic cardiomyopathy (n,%)                            | 56 (60%)      | 58 (62%)      | 39 (57%)      |
| Dilatative cardiomyopathy (n,%)                          | 30 (32%)      | 26 (28%)      | 9 (13%)       |
| Hypertrophic cardiomyopathy (n,%)                        | 0 (0%)        | 4 (4%)        | 9 (13%)       |
| Arrhythmogenic right ventricular<br>cardiomyopathy (n,%) | 0 (0%)        | 0 (0%)        | 1 (2%)        |
| Long QT syndrome (n,%)                                   | 1 (1%)        | 0 (0%)        | 4 (6%)        |
| Ischemic cardiomyopathy (n,%)                            | 56 (60%)      | 58 (62%)      | 39 (57%)      |
| Dilatative cardiomyopathy (n,%)                          | 30 (32%)      | 26 (28%)      | 9 (13%)       |

**Disclaimer/Publisher's Note:** The statements, opinions and data contained in all publications are solely those of the individual author(s) and contributor(s) and not of MDPI and/or the editor(s). MDPI and/or the editor(s) disclaim responsibility for any injury to people or property resulting from any ideas, methods, instructions or products referred to in the content.
